# Supplementary material for: Taxonomy and functional profile of microbial communities across the depths of the Alpine Cenote Abyss ice cave
Source: Springer Nature journal article supplement (doi:10.1038/s41598-025-29105-z), 2025-12-31
Supplement: MOESM1 [file 41598_2025_29105_MOESM1_ESM.docx]

**Supplementary information**


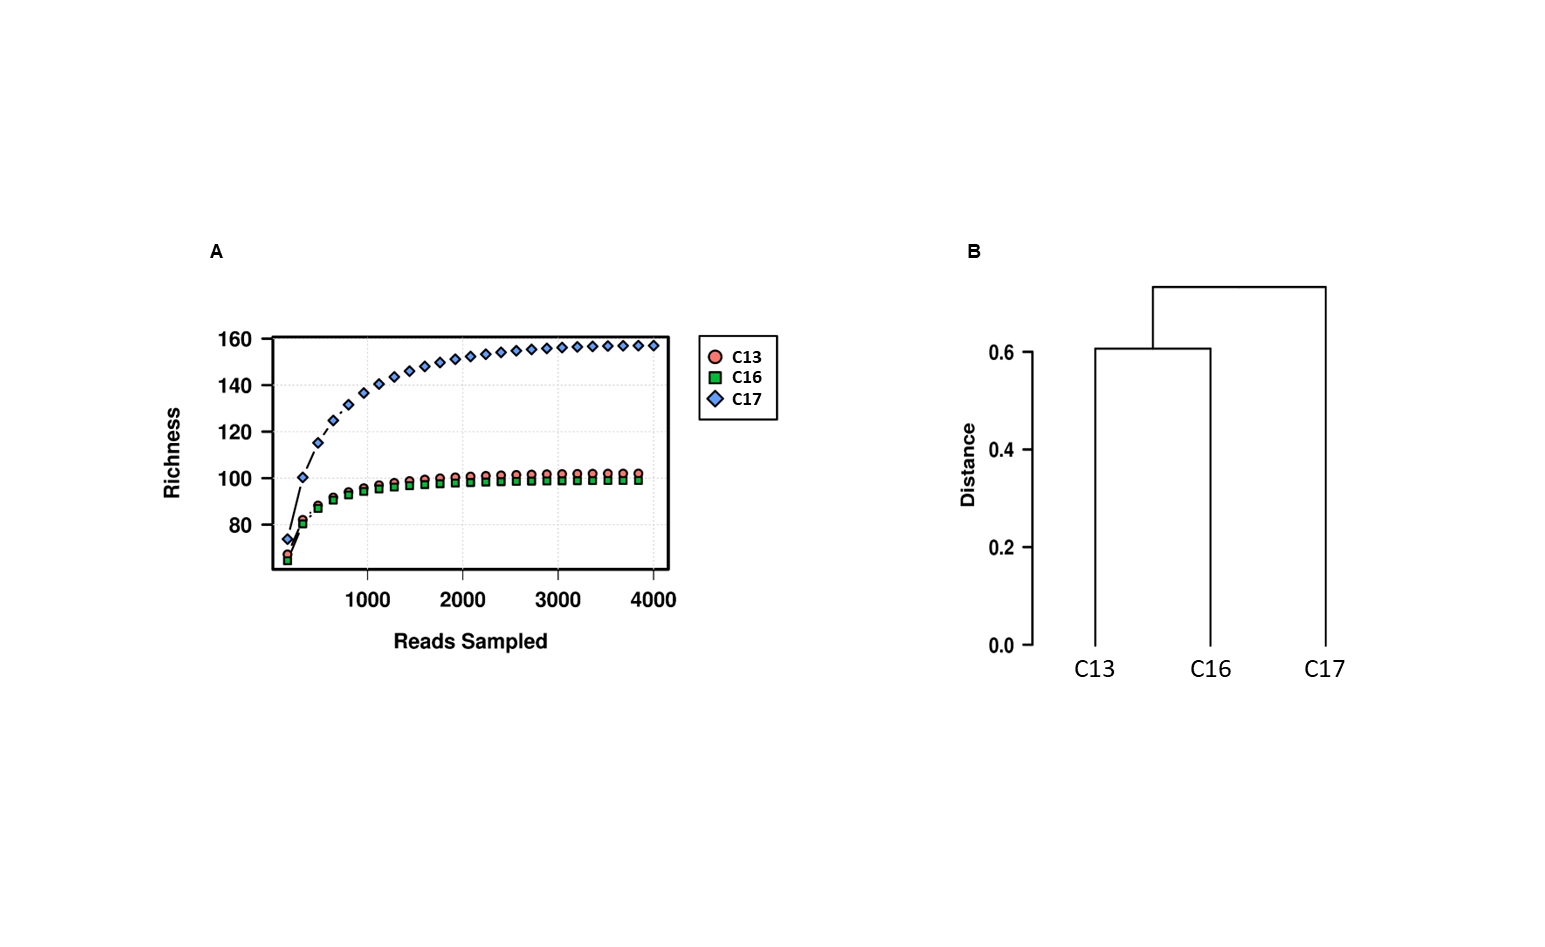


**Supplementary Figure S1**. A) Rarefaction curves and B) Bray-Curtis clustering analysis of the three cave samples.


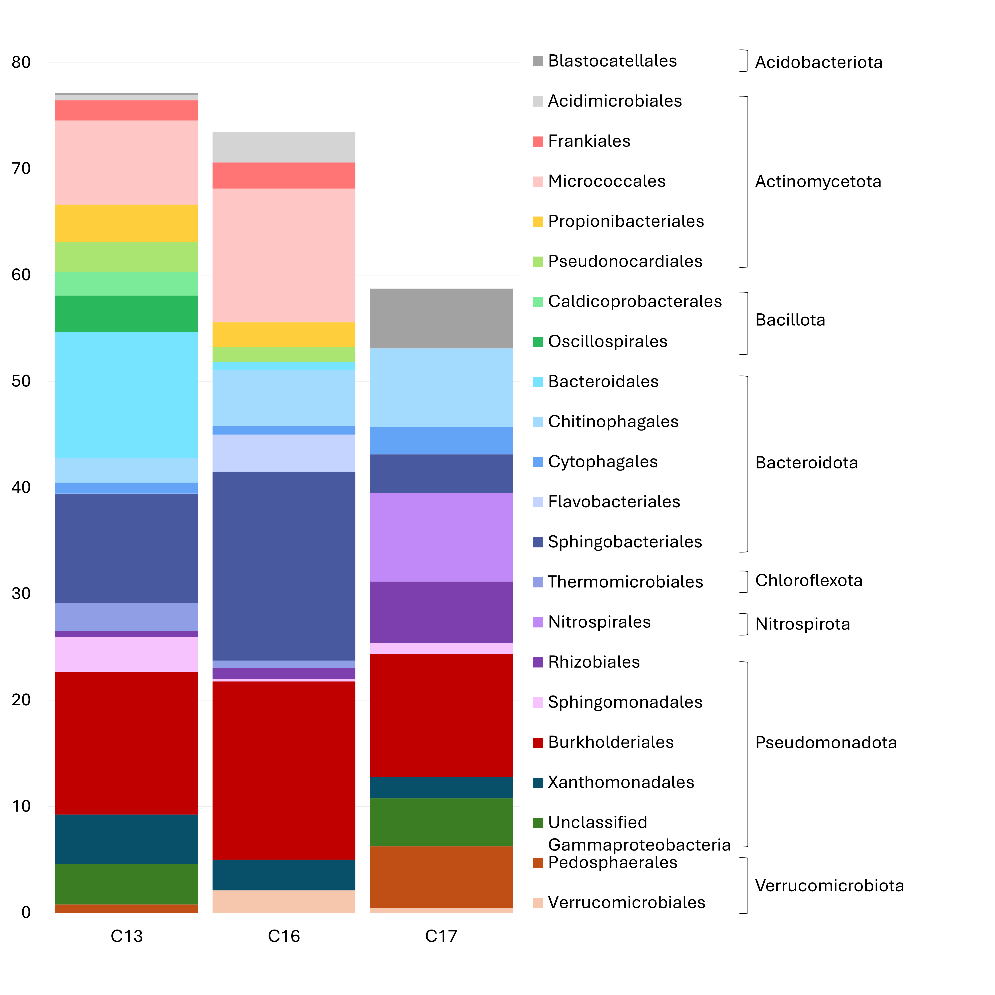


**Supplementary Figure S2**. Barplot showing the taxonomy composition of the three microbial communities at order level. Only orders with abundances > 2% are shown.

**
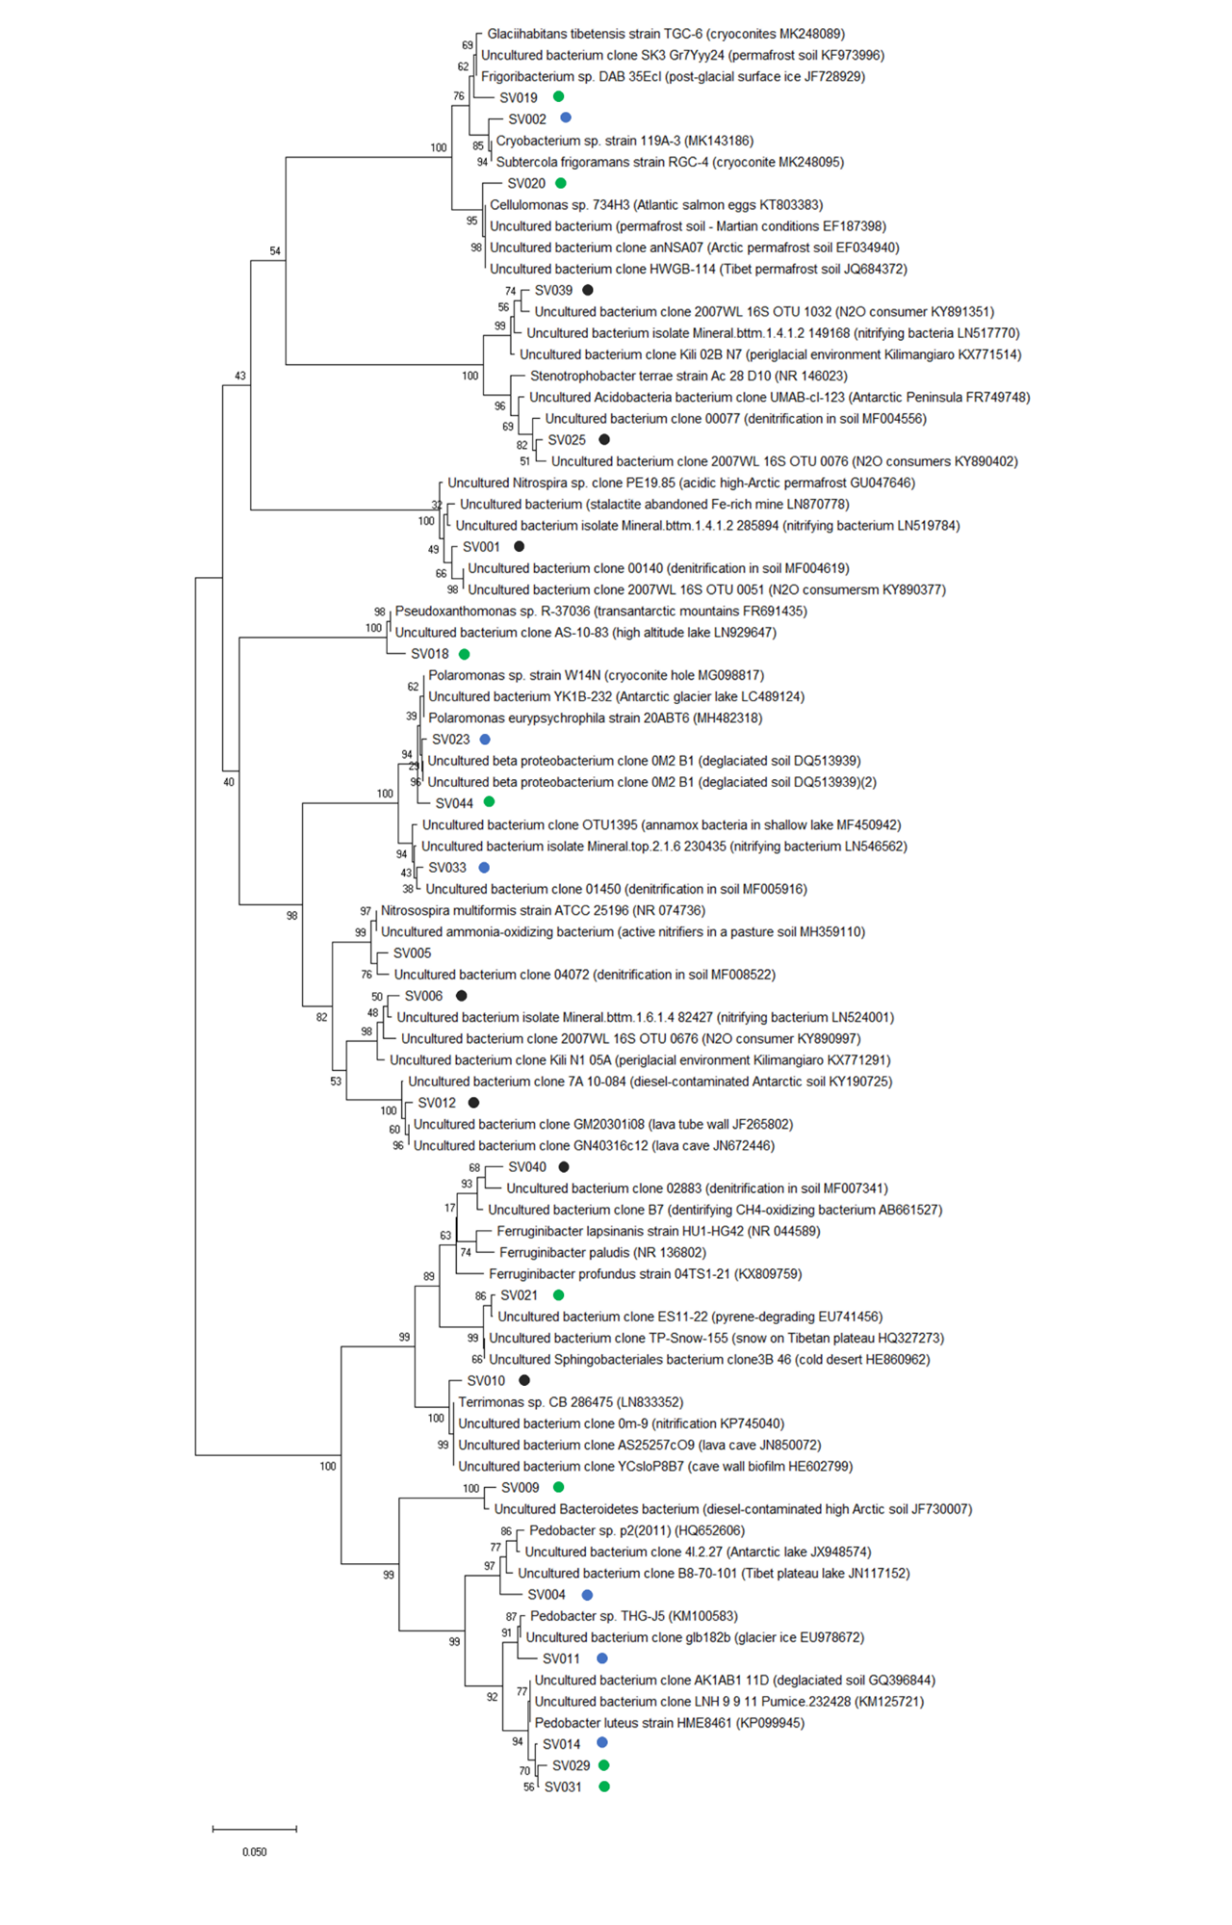
**

**Supplementary Figure S3**. Phylogenetic analysis of the most abundant ASVs retrieved from the three ice samples. Green, blue, and black dots indicate ASVs characterizing sample C13, C16, and C17, respectively.

**Supplementary Table S1**. List of genes involved in nitrogen metabolism pathways and taxonomy affiliation according to KEGG database.

| **Nitrogen metabolism** | | |
| --- | --- | --- |
| **Nitrification** | | |
|  | C13/C16 | C17 |
| pmoA-amoA  methane/ammonia monooxygenase subunit A [EC:1.14.18.3 1.14.99.39] | NO; | NO; |
| hao hydroxylamine dehydrogenase [EC:1.7.2.6] | YES;  **NITROSPIROTA(NITROSPIRIA)**-Nitrosospira sp. Nl5;  **BETAPROTEOBACTERIA-**Nitrosomonadaceae | NO, |
| narG, narZ, nxrA; nitrate reductase / nitrite oxidoreductase, alpha subunit [EC:1.7.5.1 1.7.99.-] K00370 | Yes  **ACTINOMYCETES**-Arthrobacter; Cellulomonas fimi; Nocardioides terrigena; Actinotalea subterranea; Mycobacterium tuberculosis | YES  **ACTINOMYCETES-**Mycobacterium; Micromonospora; **BETAPROTEOBACTERIA-**Comamonadaceae; Silvimonas; Pandoraea soli; Mitsuaria sp. WAJ17;  **GAMMAPROTEOBACTERIA**-Enterobacter hormaechei; Thermomonas hydrothermalis; Arenimonas maotaiensis; Pseudomarimonas arenosa  **ALPHAPROTEOBACTERIA-**Oceanibaculum; Roseomonas eburnea; |
| narH, narY, nxrB nitrate reductase / nitrite oxidoreductase, beta subunit [EC:1.7.5.1 1.7.99.-] | Yes  **ACTINOMYCETES**-Arthrobacter; Cellulomonas fimi; Nocardioides terrigena; Actinotalea subterranea; Mycobacterium tuberculosis | YES  **ACTINOMYCETES**-Mycobacterium; Micromonospora; **BETAPROTEOBACTERIA-**Comamonadaceae; Arenimonas maotaiensis; Pandoraea soli; Pseudomarimonas arenosa; Mitsuaria sp. WAJ17;  **GAMMAPROTEOBACTERIA**-Thermomonas hydrothermalis; Silvimonas; Enterobacter hormaechei;  **ALPHAPROTEOBACTERIA-**Oceanibaculum; Roseomonas eburnea; |
| **Denitrification** | | |
| narG, narZ, nxrA;  nitrate reductase / nitrite oxidoreductase, alpha subunit [EC:1.7.5.1 1.7.99.-] K00370 | Yes  **ACTINOMYCETES**-Arthrobacter; Cellulomonas fimi; Nocardioides terrigena; Actinotalea subterranea; Mycobacterium tuberculosis | YES  **ACTINOMYCETES**-Mycobacterium; Micromonospora;  **BETAPROTEOBACTERIA-**Comamonadaceae; Arenimonas maotaiensis; Pandoraea soli; Mitsuaria sp. WAJ17; Pseudomarimonas arenosa  **GAMMAPROTEOBACTERIA**-Enterobacter hormaechei; Thermomonas hydrothermalis; Silvimonas;  **ALPHAPROTEOBACTERIA-**Oceanibaculum; Roseomonas eburnea; |
| napA; nitrate reductase (cytochrome) **[EC:1.9.6.1]** K02567 | NO | NO; |
| **nirK**; nitrite reductase (NO-forming) **[EC:1.7.2.1]**  K00368  **nirS** nitrite reductase (NO-forming) / hydroxylamine reductase [EC:1.7.2.1 1.7.99.1] | YES;  **GAMMAPROTEOBACTERIA**-Luteimonas mephitis; Dyella; Luteimonas granuli Vulcaniibacterium gelatinicum; Luteimonas; Lysobacter terrestris | YES;  **ALPHAPROTEOBACTERIA-**Ochrobactrum group; Brucella; Chelatococcus;  **BETAPROTEOBACTERIA-**Leptothrix cholodnii; Burkholderiales; Comamonas granuli; Comamonadaceae bacterium; Burkholderiaceae;  **BACTEROIDOTA/CHLOROBIOTA GROUP(p_BALNEOLOTA, c_BALNEOLIA)-**Aliifodinibius halophilus;  **GAMMAPROTEOBACTERIA-**Dyella solisilvae; Lutibacter sp; Thermomonas sp.; Steroidobacter soli; Lysobacter gilvus  **c_OPITUTIA (VERRUCOMICROBIOTA)-**Opitutaceae; ; |
| norB; nitric oxide reductase subunit B [EC:1.7.2.5] K04561 | YES;  **BETAPROTEOBACTERIA-**Rhodoferax ferrireducens; Advenella | YES;  **ALPHAPROTEOBACTERIA-**Rhodospirillum centenum; Nitrobacteraceae; Sphingomonadales; Brevundimonas;  **ACIDOBACTERIOTA(c_unclassified)-**Acidobacteria bacterium |
| norC; nitric oxide reductase subunit C [EC:1.7.2.5] K02305 | YES;  **BETAPROTEOBACTERIA-**Rhodoferax ferrireducens; Advenella | YES;  **ALPHAPROTEOBACTERIA-**Rhodospirillum centenum; Nitrobacteraceae; Sphingomonadales; Brevundimonas;  **ACIDOBACTERIOTA(c_unclassified)-**Acidobacteria bacterium |
| NosZ; nitrous-oxide reductase [EC:1.7.2.4] K00376 | NO | YES  **ALPHAPROTEOBACTERIA-**Nitrobacteraceae;  **BETAPROTEOBACTERIA-**Herminiimonas sp. CN;  **GAMMAPROTEOBACTERIA-**Competibacter denitrificans |
| **Dissimilatory nitrate reduction** | | |
| narG, narZ, nxrA;  nitrate reductase / nitrite oxidoreductase, alpha subunit [EC:1.7.5.1 1.7.99.-] K00370 | Yes;  **ACTINOMYCETES**-Arthrobacter; Cellulomonas fimi; Nocardioides terrigena; Actinotalea subterranea; Mycobacterium tuberculosis | YES  **ACTINOMYCETES**-Mycobacterium; Micromonospora; **BETAPROTEOBACTERIA-**Comamonadaceae; Silvimonas; Pandoraea soli; Mitsuaria sp. WAJ17; Pseudomarimonas arenosa; Pandoraea soli; Mitsuaria sp. WAJ17; Pseudomarimonas arenosa  **GAMMAPROTEOBACTERIA-**Enterobacter hormaechei; Thermomonas hydrothermalis; Arenimonas maotaiensis;  **ALPHAPROTEOBACTERIA-**Oceanibaculum; Roseomonas eburnea; |
| napA; nitrate reductase (cytochrome) [EC:1.9.6.1] K02567 | NO | NO; |
| NirB; nitrite reductase (NADH) large subunit [EC:1.7.1.15] K00362 | NO; | NO |
| NirD; nitrite reductase (NADH) small subunit [**EC:1.7.1.15]** K00363 | NO | NO |
| NirA; ferredoxin-nitrite reductase **[EC:1.7.7.1]** K00366 | NO | NO |
| **Assimilatory nitrate reduction** | | |
| nasC, nasA assimilatory nitrate reductase catalytic subunit **[EC:1.7.99.-]** | NO | NO |
| NarB ferredoxin-nitrate reductase **[EC:1.7.7.2]** | NO | NO |
| NR nitrate reductase (NAD(P)H) **[EC:1.7.1.1 1.7.1.2 1.7.1.3]** | NO | NO |
| **nasD, nasB**; nitrite reductase [NAD(P)H] large subunit;  **nasE;** nitrite reductase [NAD(P)H] small subunit; **[EC:1.7.1.4]** | YES;  **ACTINOMYCETES-**Mycolicibacterium aurum; Pseudonocardia abyssalis; Pseudonocardia oceani; | YES;  **ACTINOMYCETES-**Frankiales bacterium: |
| NirA; ferredoxin-nitrite reductase **[EC:1.7.7.1]** | NO | NO |
| NIT-6 nitrite reductase (NAD(P)H) **[EC:1.7.1.4]** |  |  |
| **Nitrogen fixation** | | |
| **nifD**; nitrogenase molybdenum-iron protein alpha chain; **nifK**; K02591; nitrogenase molybdenum-iron protein beta chain; **nifH** nitrogenase iron protein **[EC:1.18.6.1]** | YES;  **DESULFUROMONADIA (p_THERMODESULFOBACTERIOTA)-**Geobacter chapellei | YES;  **ALPHAPROTEOBACTERIA-**Nitrobacteraceae |
| VnfD; vanadium-dependent nitrogenase alpha chain **[EC:1.18.6.2]** | NO | NO |
| **AnamMox** | | |
| nirK nitrite reductase (NO-forming) **[EC:1.7.2.1]** | YES;  **GAMMAPROTEOBACTERIA**-Luteimonas mephitis; Dyella; Luteimonas granuli Vulcaniibacterium gelatinicum; Luteimonas; Lysobacter terrestris | YES;  **ALPHAPROTEOBACTERIA-**Ochrobactrum group;Brucella; Chelatococcus;  **BETAPROTEOBACTERIA-**Leptothrix cholodnii; Burkholderiales; Comamonas granuli;  **BACTEROIDOTA/CHLOROBIOTA GROUP(p_BALNEOLOTA, c_BALNEOLIA)-**Aliifodinibius halophilus |
| K20932 hydrazine synthase subunit **[EC:1.7.2.7]** | NO | NO |
| Hdh hydrazine dehydrogenase **[EC:1.7.2.8]** | NO | NO |
|  | | |
| Gdh glutamate dehydrogenase;  glutamic dehydrogenase;  glutamate dehydrogenase (NAD+) **[EC 1.4.1.2]** | NO | YES;  **DELTAPROTEOBACTERIA-**Deltaproteobacteria,  **POLYANGIA (p_MYXOCOCCOTA)-**Labilithrix luteola |
| glsA, GLS glutaminase **[EC:3.5.1.2]** | Yes;  **ACTINOMYCETES-**Actinobacteria, Cellulomonas biazotea, Amycolatopsis, Microbacterium paludicola, Nocardioides massiliensis, Cellulomonas carbonis.  **CLOSTRIDIA (p_BACILLOTA)-**Firmicutes, Anaerobacterium chartisolvens  **NITROSPIROTA**-Nitrospirae | Yes;  **ALPHAPROTEOBACTERIA-**Alphaproteobacteria, Bradyrhizobium, Phreatobacter stygius, Sphingomonas, Stellaceae;Stella  **ACTINOMYCETES-**Actinobacteria, Bifidobacteriaceae,  **CANDIDATUS AMICINENANTOTA-**Candidatus Aminicenantes |
| EC 3.5.1.5 urease Hydrolases | YES;  **ALPHAPROTEOBACTERIA-**Alphaproteobacteria, Bradyrhizobium.  **BETAPROTEOBACTERIA-**Betaproteobacteria, Delftia tsuruhatensis.  **ACTINOMYCETES-**Actinobacteria, Pseudonocardia nigra | YES;  **ALPHAPROTEOBACTERIA-**Alphaproteobacteria, Bradyrhizobium, Rhodopseudomonas palustris, Rhizobium/Agrobacterium group, Phreatobacter oligotrophus, Phreatobacter stygius, Arboricoccus pini.  **DELTAPROTEOBACTERIA-**Deltaproteobacteria,  **MYCOCOCCIA (p_MYXOCOCCOTA)-**Archangium violaceum,  **ACTINOMYCETES-**Actinobacteria, Mycobacterium tuberculosis, Geodermatophilaceae. |

**Supplementary Table S2**. List of genes involved in carbon metabolism pathways and taxonomy affiliation according to KEGG database.

| **Calvin–Benson–Bassham (CBB)** | | |
| --- | --- | --- |
|  | C13 sample | C17 sample |
| **4.1.1.39** ribulose-bisphosphate carboxylase large chain RUBISCO  rbcL, cbbL | YES;  **Actinobacteria**; Gordoniaceae-Skermania-Skermania piniformis, Pseudonocardia asaccharolytica, Pseudonocardia xinjiangensis, Pseudonocardia sp. MH-G8, Pseudonocardia sp. C8; **Alphaproteobacteria**-Nitrobacteraceae;  **Verrucomicrobia incertae sedis**-Methylacidimicrobium sp. AP8 | YES;  **Actinobacteria**- Mycobacterium, Solirubrobacteraceae  **Betaproteobacteria**- Rhizobacter  **Alphaproteobacteria**-Methylocella tundrae; Rhodospirillales;  **Gammaproteobacteria**- Coralloluteibacterium stylophorae |
| **2.7.2.3** Phosphoglycerate Kinase PGK pgk | YES;  **Betaproteobacteria-** Rhodoferax antarcticus, Comamonadaceae, Polynucleobacter sp. MWH-CaK5  **Gammaproteobacteria-**Xanthomonadaceae, Lysobacter xinjiangensis  **Chloroflexi**  **Actinobacteria**- Pseudonocardia dioxanivorans, Mycetocola zhujimingii. | YES;  **Alphaproteobacteria-**Novispirillum itersonii, Sphingomonas, Pelagibius litoralis, Erytrobacter, Bradyrhizobium, Novosphingobium, Reyranella sp, Phreatobacter stygius, Chakrabartia godavariana  **Gammaproteobacteria-**Halomonas;  **Nitrospira**-Nitrospira sp.; **Actinobacteria**-Micrococcales, Rhabdothermincola salaria **Firmicutes**-Alicyclobacillus kakegawensis; Salinicoccus albus, Effusibacillus lacus, Schnuerera sp  **Betaproteobacteria**-Pusillimonas ginsengisoli.  **Bacteroidetes/Chlorobi group-**Bacteroidetes bacterium.  **Acidobacteria**-Acidobacteria bacterium, Luteitalea sp  **FCB group;Gemmatimonadetes-** Gemmatimonadetes bacterium. **PVC group;Verrucomicrobia**  Verrucomicrobia bacterium |
| **1.2.1.12** | YES;  **Gammaproteobacteria**-Xanthomonas;, Xanthomonadaceae, Pseudoxanthomonas, Xanthomonadales, Thermomonas aquatica, Lysobacter  **Alphaproteobacteria**-Bradyrhizobium;,Sphingomonadaceae, Sphingomonas  **Actinobacteria**-Pseudonocardia, Pseudonocardia sediminis, Kineosporia rhizophila; Arthrobacter sp, Spinactinospora alkalitolerans;  **Acidobacteria**-Acidobacteria bacterium RIFCSPLOWO2_12_FULL_67_14b; bacterium RIFOXYD1_FULL_69_11; **PVC group;Verrucomicrobia**-Luteolibacter luteus;; | YES;  **PVC group;Planctomycetes** Isosphaera pallida;  **FCB group;Bacteroidetes/Chlorobi group**- Chitinophagaceae, Sphingomonas, Sphingobacteriia  **Alphaproteobacteria**-Bradyrhizobium centrolobii , Bosea sp,Phenylobacterium; Candidatus Uhrbacteria; Bradyrhizobium sp. OK095; Burkholderiales bacterium; Hyphomicrobiales bacterium; Sphingomonas Novosphingobium  **Nitrospira**, Nitrospira -  **Acidobacteria-**Acidobacteria bacterium;  **Gammaproteobacteria** bacterium HGW-Gammaproteobacteria-4;  **Chloroflexi**-Anaerolineaceae bacterium;  FCB group;Bacteroidetes/Chlorobi group- bacterium; Candidatus Uhrbacteria bacterium; unclassified Rhizobacter; |
| GAPA glyceraldehyde-3-phosphate dehydrogenase (NADP+) (phosphorylating) **[EC:1.2.1.13]** | NO; | NO; |
| gap2, gapB glyceraldehyde-3-phosphate dehydrogenase (NAD(P)+) (phosphorylating) [**EC:1.2.1.59]** | NO; | NO; |
| fructose-bisphosphate aldolase, class I [**EC:4.1.2.13**] ALDO | YES;  **Actinobacteria**- Amycolatopsis, Saccharopolyspora, Pseudonocardia, Agromyces, Actinokineospora, Corynebacteriales, Nocardioidaceae, Microbacteriaceae, Geodermatophilaceae, Tetrasphaera jenkinsii, Kineosporia babensis, Herbidospora sakaeratensis, Cellulomonas, Nakamurella aerolata, Aeromicrobium sp., Phycicoccus  **Gammaproteobacteria**-Lysobacter, Xanthomonadaceae, Pseudoxanthomonas yeongjuensis  **Alphaproteobacteria**-Bradyrhizobium, Bradyrhizobium macuxiense  **Betaproteobacteria**-Polaromonas naphthalenivorans, Roseateles aquatilis, Polaromonas eurypsychrophila, Rhizobacter  **FCB group;Bacteroidetes/Chlorobi group**-Joostella marina | YES;  **Alphaproteobacteria**-Hyphomicrobiales; Bradyrhizobium, Nitrobacteraceae  **Actinobacteria**; Microbacterium;; Kocuria; Cellulomonas, Kineosporia babensis, Tessaracoccus ,Afipia birgiae; Afipia massiliensis  **PVC group;Verrucomicrobia**-unclassified Opitutae; **Betaproteobacteria**, Salinisphaera orenii; |
| fructose-1,6-bisphosphatase I [EC:**3.1.3.11**] FBP, fbp | **Actinobacteria**-Pseudonocardia, Nocardioides ungokensis; Pseudonocardia sp. MH-G8; Mycobacterium sp. shizuoka-1  **Betaproteobacteria**- Rhodoferax | **FCB group;Bacteroidetes/** **Chlorobi group**-Bacteroidetes, c_SPHINGOB Olivibacter domesticus,  c_CHITINO Sediminibacterium goheungense, Paraflavitalea devenefica  **Alphaproteobacteria**, Sphingomonas, Roseivivax jejudonensis Reyranella  **Nitrospirae-**Nitrospirae bacterium |
| transketolase [**EC:2.2.1.1**] | **Actinobacteria**-Pseudonocardia, Pseudonocardiaceae; Pseudonocardia xinjiangensis,Microbacterium, Nocardiaceae Pseudonocardia xinjiangensis, Pseudonocardia nigra, Pseudonocardia abyssalis; Pseudonocardia oceani; Pseudonocardia broussonetiae Knoellia, Georgenia, Arthrobacter, Oryzihumus leptocrescens, Actinospica robiniae, Cryobacterium aureum, Amnibacterium Compostimonas suwonensis, Diaminobutyricibacter tongyongensis, Desertimonas flava, Glaciihabitans sp., Nocardioides luti, Actinotalea,  **Gammaproteobacteria**-Xanthomonadaceae, Pseudoxanthomonas, Mizugakiibacter sediminis, Coralloluteibacterium stylophorae, Xanthomonadaceae, Rhodanobacteraceae  **Alphaproteobacteria**- Nitrobacteraceae,  **Betaproteobacteria**-Nitrosomonadaceae, Burkholderiales; bacterium,  **delta/epsilon subdivisions;Deltaproteobacteria-**Desulfosarcina alkanivorans | **Alphaproteobacteria**-Hyphomicrobium sp., Bradyrhizobium sp., Methylobacterium; Afipia, Afipia broomeae, Sphingomonadaceae, Sphingomonas, Nitrobacteraceae, Novosphingobium, Sphingomonas sp., Sphingomonas prati, Pseudorhodoplanes, Phreatobacter stygiu, Methyloceanibacter sp. unclassified Sphingomonas; Gemmatimonadaceae bacterium; Afipia sp. Root123D2; bacterium RBG_16_66_20; unclassified Hydrogenophilales; Gemmatimonadetes bacterium; Sphingomonas sp. EC-HK361; Sphingomonas sp. FARSPH; Gemmatimonadales bacterium; Sphingorhabdus profundilacus;  **Gammaproteobacteria**- Raoultella, Coxiella sp., Gammaproteobacteria bacterium, Chromatiales bacterium, Aliikangiella sp.; DG_40;  **Actinobacteria**-Micrococcaceae;;, Propionibacteriaceae. Cellulomonas bogoriensis Micrococcales, Rubrobacter marinus, Phycicoccus sp., Actinobacteria bacterium; Miltoncostaea marina  **Betaproteobacteria**-Nitrosomonas aestuarii, Comamonadaceae, Burkholderiales bacterium.  **Deltaproteobacteria**-Desulfobacterales bacterium SG8_35_2; i; Desulfovibrionaceae bacterium  **Deinococcota**-Meiothermus rufus;;  **Bacteroidetes-**Bacteroidetes bacterium SW_9_63_38; s;;;; **Planctomycetes**-Anatilimnocola aggregata;; Frigoriglobus tundricola;; |
| fructose-1,6-bisphosphatase II / sedoheptulose-1,7-bisphosphatase [EC:**3.1.3.11** **3.1.3.37**] glpX-SEBP | **Actinobacteria**-Pseudonocardia; Nocardioides ungokensis; Pseudonocardia; Mycobacterium **Alphaproteobacteria**-Comamonadaceae;Rhodoferax; | **Chlorobi group;Bacteroidetes**; Paraflavitalea devenefica; Bacteroidetes bacterium 37-13; Bacteroidetes bacterium; **Alphaproteobacteria**-Sphingomonas; Polytomella parva; Olivibacter domesticus; Sediminibacterium goheungense; Roseivivax jejudonensis; Reyranella sp.; **Nitrospirae**-Nitrospirae bacterium RIFCSPLOWO2_02_FULL_62_14; **Actinobacteria**-Phycicoccus sp. MQZ13P-5; |
| triosephosphate isomerase (TIM) [EC:**5.3.1.1**]  TPI, tpiA | YES;  **Actinobacteria**-Actinotalea fermentans, Pseudoxanthomonas koreensis; Pseudonocardia sp. CGMCC 4.1532; Prauserella muralis;  **Betaproteobacteria**-Albitalea terrae; **Alphaproteobacteria**-unclassified Bradyrhizobium;  **Gammaproteobacteria**-Lysobacter terrestris. Lysobacter spongiicola; | YES;  **Alphaproteobacteira**-Methylobacterium; Afipia clevelandensis; Blastochloris viridis; Nitrobacteraceae; Sphingomonas sp. FARSPH; Afipia;  **Gammaproteobacteria**-Halomonas ilicicola; Chromatiales bacterium;  **Firmicutes**-Staphylococcus; Hydrogenibacillus; Anaerofilum sp. An201;  **Planctomycetes**-Planctomycetia; Planctomycetes bacterium;  **Betaproteobacteria**-Betaproteobacteria bacterium RIFCSPLOWO2_02_64_14; Thiobacillus sp. 65-29; **Acidobacteria**-Acidobacteria bacterium;  **Chloroflexi**-Tepidiforma bonchosmolovskayae; **Verrucomicrobia**-Oleiharenicola |
| ribose 5-phosphate isomerase A [EC:**5.3.1.6**] rpiA | **MOLLICUTES (p_MYCOPLASMOTA)-**Spiroplasma;  **GAMMAPROTEO**-Xanthomonadaceae; Stenotrophomonas rhizophila; Thermomonas beijingensis;  **ACTINOMYCETES-**Pseudonocardia; Pseudoxanthomonas; unclassified Actinomyces; Pseudonocardia abyssalis;  **BETAPROTEO**-Xylophilus rhododendri; | **ALPHAPROTEO-**Bradyrhizobium; Sphingomonas; unclassified Sphingomonas; Bradyrhizobium lablabi; Bradyrhizobium;  **GAMMAPROTEO-**Escherichia coli; Corallincola holothuriorum;  **ACTINOMYCES-**Actinotalea fermentans; Streptomyces sp. PIP175;  **BETAPROTEO-**Achromobacter aloeverae; Phreatobacter stygius;  **ACIDOBACTERIA-**Acidobacteria bacterium;  **VERRUCOMICROBIIA (VERRUCOMICROBIOTA)-**Pedosphaera sp.; |
| ribulose-phosphate 3-epimerase [EC:**5.1.3.1**] rpe, RPE | YES;  **ALPHAPROTEO-**Bradyrhizobium; Nitrobacteraceae; Caulobacter mirabilis;  **ACTINOMYCETES-**Pseudonocardia; Corynebacteriales; Cellulomonas sp. KRMCY2  **GAMMAPROTEO-**Reinekea marinisedimentorum; | YES;  **GAMMAPROTEO-**Lysobacter; **ALPHAPROTEO-**Bradyrhizobium; Nitrobacteraceae; Sphingomonas sp. FARSPH; unclassified Afipia;  **ACTINOMYCES-**unclassified Actinobacteria;  **CHLOROFLEXOTA-**Chloroflexi bacterium RBG_16_68_14;  **ACIDOBACTERIA**Acidobacteria bacterium; |
| PRK, prkB; phosphoribulokinase [EC**:2.7.1.19**] | YES;  **ACTINOMYCES-**Actinomycetia; Mycobacteriaceae;  **GAMMAPROTEO-**Arenimonas; | **ALPHAPROTEO-**Nitrobacteraceae |
